# Supplementary material for: Acetylcholinesterase-catalyzed silver deposition for ultrasensitive electrochemical biosensing of organophosphorus pesticides
Source: Royal Society of Chemistry journal article supplement (doi:10.1039/c9an02546d), 2020-01-01
Supplement: c9an02546d1.pdf [file c9an02546d1.pdf]

## Supporting Information

# Acetylcholinesterase-catalyzed Silver Deposition for Ultrasensitive Electrochemical Biosensing of Organophosphorus Pesticide

Zhenhui Liu, Xin Xia, Guoxing Zhou, Lei Ge,\* and Feng Li\*

College of Chemistry and Pharmaceutical Sciences, Qingdao Agricultural University, Qingdao,  
266109, People's Republic of China

\*Corresponding author: Lei Ge, Feng Li

E-mail: lge@qau.edu.cn, lifeng@qust.edu.cn

Telephone: +86-532-86080855

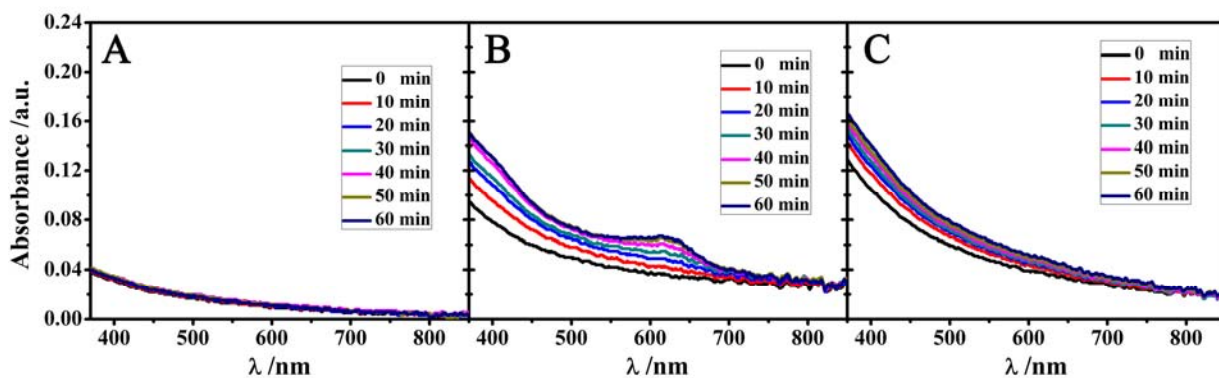

**Figure S1.** (A) Time-dependent absorbance changes of 2.0 mM IDA solution. (B) Time-dependent absorbance changes of working solution containing 2.0 mM IDA, 1.0 mM  $\text{AgNO}_3$ , and 1.0 mU/mL AChE (exposed to air). (C) Time-dependent absorbance changes of 2.0 mM IDA solution containing 1.0 mU/mL AChE.

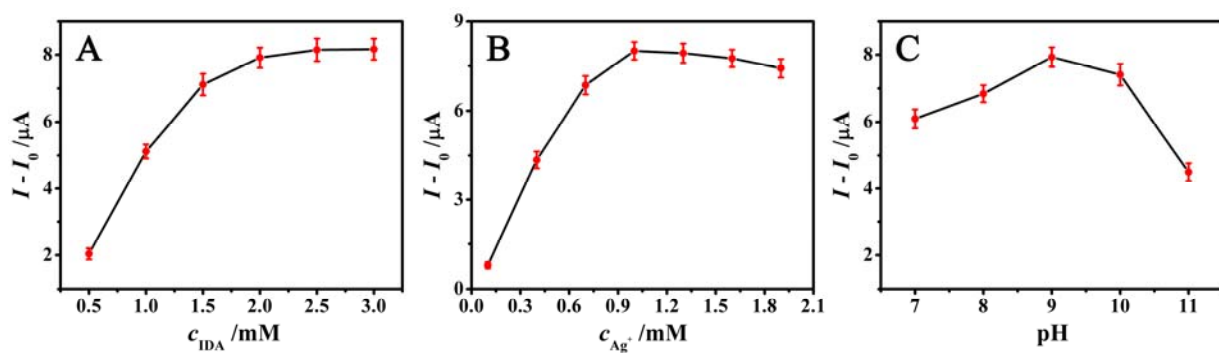

**Figure S2.** The effects of (A) IDA concentration, (B)  $\text{Ag}^+$  concentration, and (C) pH on the AChE-catalyzed silver deposition reaction.  $I_0$  and  $I$  are the peak current intensity of LSV curve in the absence and presence of 1.0 mU/mL AChE, respectively.

**Table S1.** Assay performance comparison of our electrochemical biosensor with other sensors for chlorpyrifos.

| Detection method                    | Linear range                       | Detection limit | Reference |
|-------------------------------------|------------------------------------|-----------------|-----------|
| Electrochemical method              | 10 nM to 1.0 $\mu$ M               | 4.0 nM          | 1         |
| Electrochemical method              | 0.1 ng/mL to 10 <sup>5</sup> ng/mL | 33 pg/mL        | 2         |
| Electrochemical method              | 20 $\mu$ M to 110 $\mu$ M          | 3.5 $\mu$ M     | 3         |
| Electrochemical method              | 10 fM to 1.0 $\mu$ M               | 10 fM           | 4         |
| Electrochemical method              | 1.5 nM to 40 nM                    | 1.5 nM          | 5         |
| Chemiluminescence                   | 0.1 ng/mL to 50 ng/mL              | 33 pg/mL        | 6         |
| Chemiluminescence                   | 1.0 ng/mL to 60 ng/mL              | 33 pg/mL        | 7         |
| Surface-Enhanced Raman Spectroscopy | ----                               | 1.0 $\mu$ M     | 8         |
| Surface-Enhanced Raman Spectroscopy | 1.0 nM to 10 $\mu$ M               | 0.78 nM         | 9         |
| Microimmunoassay                    | 0.26 ng/mL to 18 ng/mL             | 0.11 ng/mL      | 10        |
| Photoelectrochemical method         | 0.3 ng/mL to 80 ng/mL              | 10 pg/mL        | 11        |
| Photoelectrochemical method         | 0.2 $\mu$ M to 16 $\mu$ M          | 10 nM           | 12        |
| Photoelectrochemical method         | 0.1 ng/mL to 50 ng/mL              | 30 pg/mL        | 13        |
| Electrochromic method               | 100 fM to 1.0 mM                   | 0.1 pM          | 14        |
| Fluorescence                        | 0.1 nM to 10 $\mu$ M               | 0.1 nM          | 15        |
| Electrochemical method              | 10 pM to 10 nM                     | 4.0 pM          | This work |

## References

- (1) Zamfir, L.-G.; Rotariu, L.; Bala, C. *Biosensors and Bioelectronics* **2011**, *26*, 3692-3695.
- (2) Jiao, Y.; Hou, W.; Fu, J.; Guo, Y.; Sun, X.; Wang, X.; Zhao, J. *Sensors and Actuators B: Chemical* **2017**, *243*, 1164-1170.
- (3) Kumaravel, A.; Chandrasekaran, M. *Journal of Agricultural and Food Chemistry* **2015**, *63*, 6150-6156.
- (4) Talan, A.; Mishra, A.; Eremin, S. A.; Narang, J.; Kumar, A.; Gandhi, S. *Biosensors and Bioelectronics* **2018**, *105*, 14-21.
- (5) Chauhan, N.; Narang, J.; Pundir, C. S. *Biosensors and Bioelectronics* **2011**, *29*, 82-88.
- (6) Ouyang, H.; Lu, Q.; Wang, W.; Song, Y.; Tu, X.; Zhu, C.; Smith, J. N.; Du, D.; Fu, Z.; Lin, Y. *Analytical Chemistry* **2018**, *90*, 5147-5152.
- (7) Ouyang, H.; Tu, X.; Fu, Z.; Wang, W.; Fu, S.; Zhu, C.; Du, D.; Lin, Y. *Biosensors and Bioelectronics* **2018**, *106*, 43-49.
- (8) Xu, Q.; Guo, X.; Xu, L.; Ying, Y.; Wu, Y.; Wen, Y.; Yang, H. *Sensors and Actuators B: Chemical* **2017**, *241*, 1008-1013.
- (9) Yao, G.-H.; Liang, R.-P.; Huang, C.-F.; Wang, Y.; Qiu, J.-D. *Analytical Chemistry* **2013**, *85*, 11944-11951.
- (10) Dobosz, P.; Morais, S.; Bonet, E.; Puchades, R.; Maquieira, Á. *Analytical Chemistry* **2015**, *87*, 9817-9824.
- (11) Wang, H.; Zhang, B.; Zhao, F.; Zeng, B. *ACS Applied Materials & Interfaces* **2018**, *10*, 35281-35288.
- (12) Li, H.; Li, J.; Xu, Q.; Hu, X. *Anal. Chem.* **2011**, *83*, 9681-9686.
- (13) Liu, Q.; Yin, Y.; Hao, N.; Qian, J.; Li, L.; You, T.; Mao, H.; Wang, K. *Sensors and Actuators B: Chemical* **2018**, *260*, 1034-1042.
- (14) Capoferri, D.; Álvarez-Diduk, R.; Del Carlo, M.; Compagnone, D.; Merkoçi, A. *Analytical Chemistry* **2018**, *90*, 5850-5856.
- (15) Zhang, K.; Mei, Q.; Guan, G.; Liu, B.; Wang, S.; Zhang, Z. *Analytical Chemistry* **2010**, *82*, 9579-9586.
